# Supplementary material for: MiR-17-5p and miR-20a promote chicken cell proliferation at least in part by upregulation of c-Myc via MAP3K2 targeting
Source: PubMed Central journal article supplement (PMC5696470; doi:10.1038/s41598-017-15626-9), 2017-11-20
Supplement: 41598_2017_15626_MOESM1_ESM.pdf [file 41598_2017_15626_MOESM1_ESM.pdf]

1 **MiR-17-5p and miR-20a promote chicken cell proliferation at least in**  
2 **part by upregulation of c-Myc via MAP3K2 targeting**

3 Xiaofei Zhang<sup>1,2,3</sup>, He Song<sup>1,2,3</sup>, Shupeiqiao<sup>1,2,3</sup>, Jing Liu<sup>1,2,3</sup>, Tianyu Xing<sup>1,2,3</sup>, Xiaohong Yan<sup>1,2,3</sup>,  
4 Hui Li<sup>1,2,3</sup>, Ning Wang<sup>1,2,3\*</sup>

5  
6  
7 <sup>1</sup>Key Laboratory of Chicken Genetics and Breeding, Ministry of Agriculture, Harbin 150030,  
8 Heilongjiang, China

9 <sup>2</sup>Key Laboratory of Animal Genetics, Breeding and Reproduction, Education Department of  
10 Heilongjiang Province, Harbin 150030, Heilongjiang, China

11 <sup>3</sup>Key Laboratory of Animal cells and genetic engineering of Heilongjiang Province, Harbin  
12 150030, Heilongjiang, China

13  
14  
15  
16  
17  
18  
19  
20  
21  
22  
23  
24  
25  
26  
27  
28  
29  
30  
31  
32  
33  
34  
35  
36  
37  
38  
39  
40

a

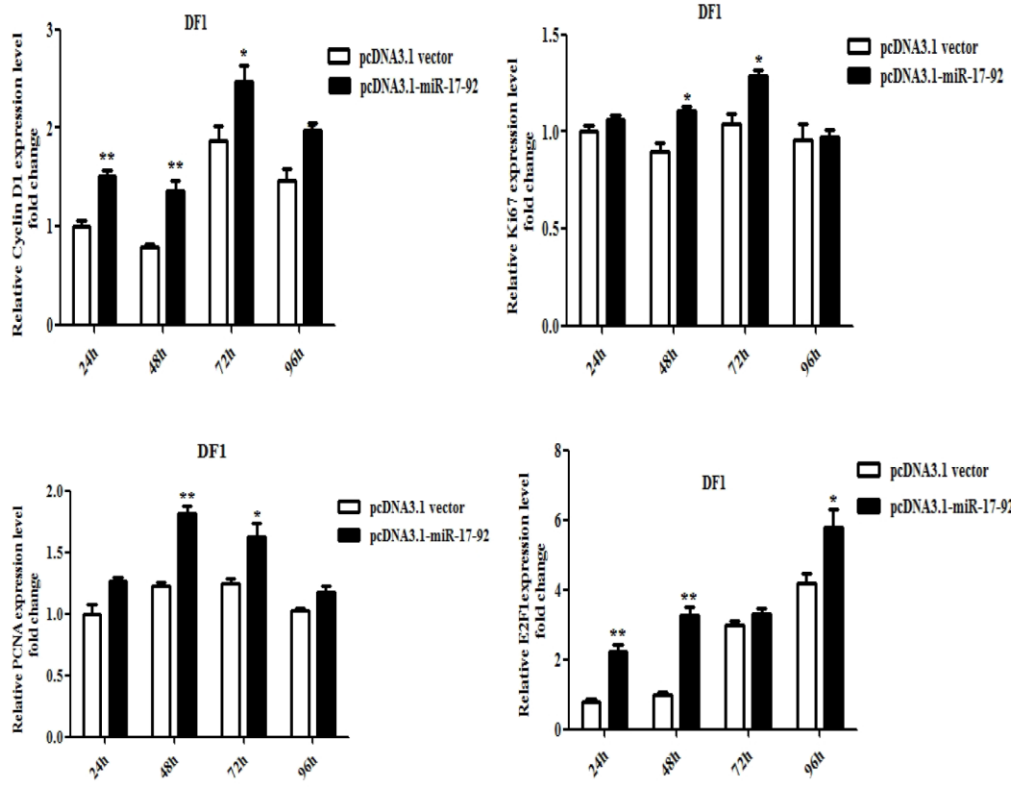

b

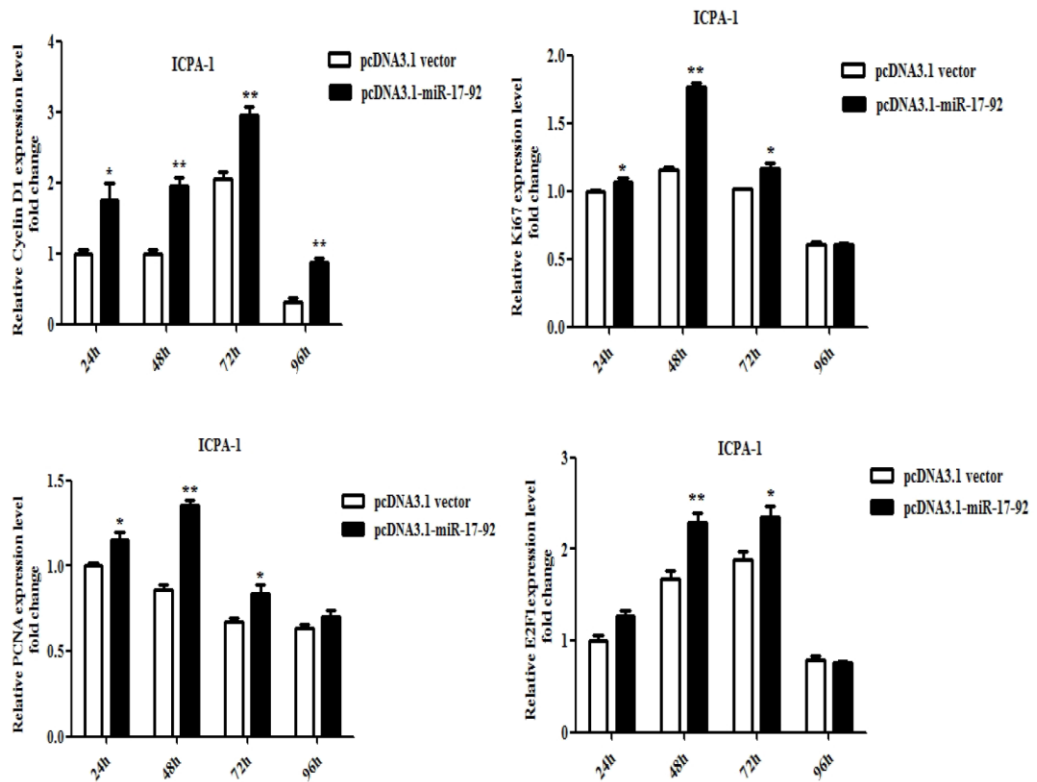

41

42

43

44  
45  
46  
47  
48  
49  
50  
51  
52  
53  
54  
55  
56  
57  
58  
59  
60  
61  
62  
63  
64  
65  
66  
67  
68  
69  
70  
71  
72  
73  
74  
75  
76  
77  
78  
79  
80  
81  
82  
83  
84  
85  
86  
87

**Supplementary Figure S1. Effect of miR-17-92 cluster overexpression on the expression of proliferation marker genes in DF1 cells and ICPA-I cells.** (a and b) Cells were transfected with either pcDNA3.1-miR-17-92 or pcDNA3.1 vector, total RNA was subsequently isolated at the designated time points, and the gene expression of Cyclin D1, Ki67, PCNA and E2F1 was assessed at the designated time points using qRT-PCR. Gene expression was normalized to NONO mRNA level. Fold change is relative to pcDNA3.1 vector at 24 h after transfection. All data are representative of three independent experiments and shown as the mean  $\pm$  SEM. \*  $p < 0.05$ ; \*\*  $p < 0.01$ ; determined by two-tailed Student's t-test.

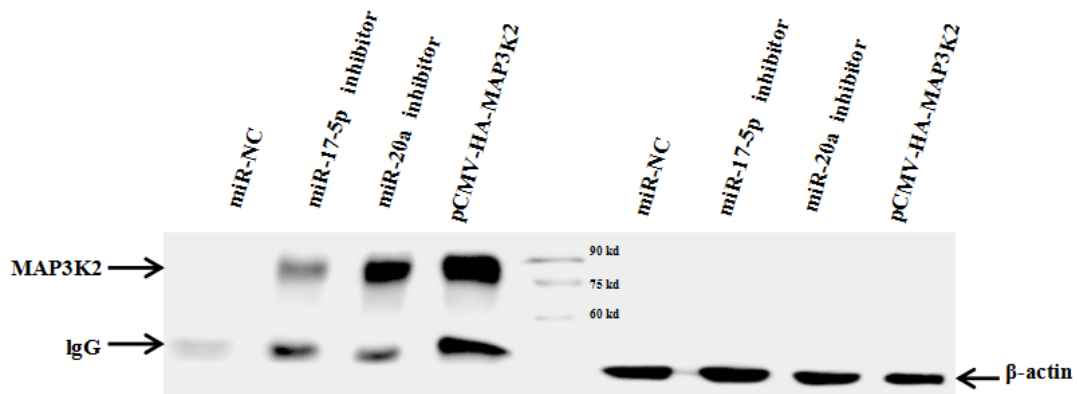

89

90

91 **Supplementary Figure S2. IP-western blot analysis of MAP3K2 in DF1 cells.** DF1 cells were  
92 transfected with the indicated miRNA inhibitors and pCMV-HA-MAP3K2 (positive control). At  
93 48 h post transfection, the cells were harvested, and MAP3K2 protein expression was assessed  
94 using IP-western blot analysis (left panel). Matched inputs were assayed for  $\beta$ -actin using western  
95 blotting (right panel).

96

97

98

99

100

101

102

103

104

105

106

107

108

109

110

111

112

113

114

115

116

117

118

119

120

121

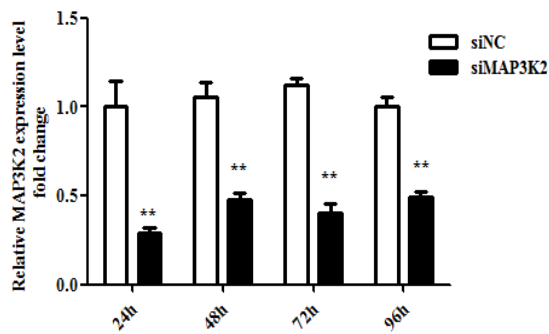

122

123

124

125 **Supplementary Figure S3. The efficiency of the knockdown effect of MAP3K2 siRNA**

126 **(siMAP3K2)**. DF1 cells were transfected with siMAP3K2. At 24, 48, 72 and 96 h after

127 transfection, total RNA was isolated, and MAP3K2 expression was detected using qRT-PCR. The

128 NONO gene was used as an internal control. Gene expression was normalized to NONO mRNA

129 level. Fold change is relative to siNC at 24 h after tranfection. All data are representative of three

130 independent experiments and shown as the mean  $\pm$  SEM. \*\*  $p < 0.01$ ; determined by two-tailed

131 Student's t-test.

132

133

134

135

136

137

138

139

140

141

142

143

144

145

146

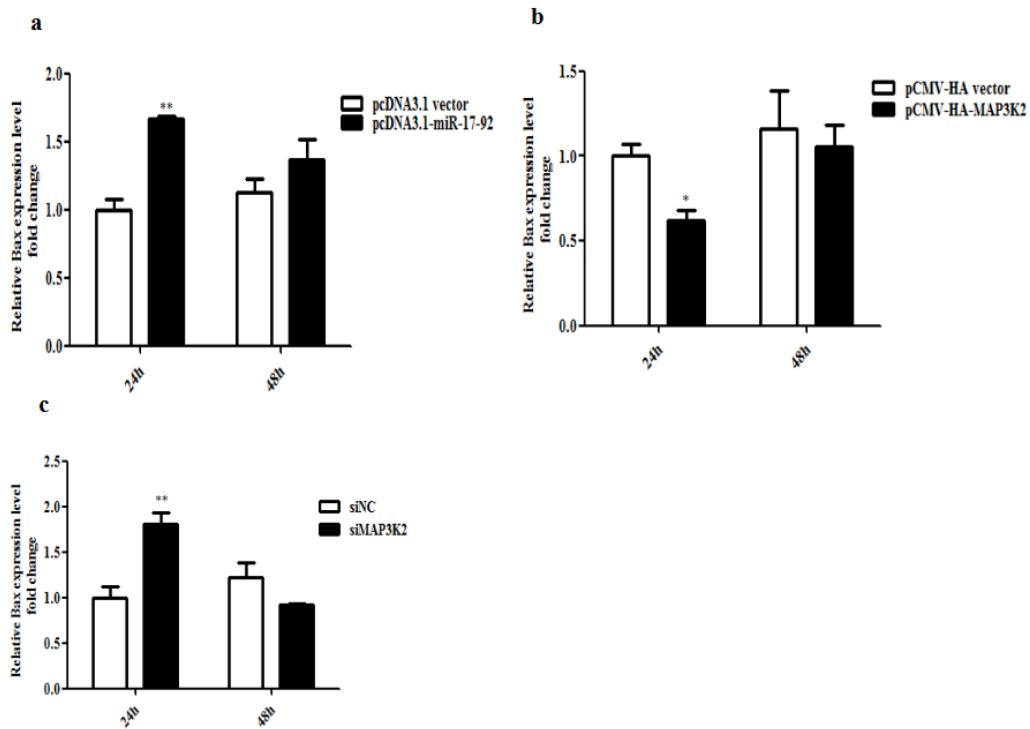

148

149 **Supplemental Figure S4. Effects of overexpression of miR-17-92 cluster and MAP3K2 and**  
 150 **knockdown of MAP3K2 on Bax expression.** DF1 cells (a-c) were transfected with designated  
 151 plasmids or siRNAs. At 24 and 48 h, respectively, after transfection, total RNA was isolated, and  
 152 Bax expression was detected using qRT-PCR. Gene expression was normalized to NONO mRNA  
 153 level. Fold change is relative to either pcDNA3.1 vector, pCMV-HA vector or siNC at 24 h after  
 154 transfection. All data are representative of three independent experiments and shown as the  
 155 mean  $\pm$  SEM. \*  $p < 0.05$ ; \*\*  $p < 0.01$ ; determined by two-tailed Student's t-test.

156

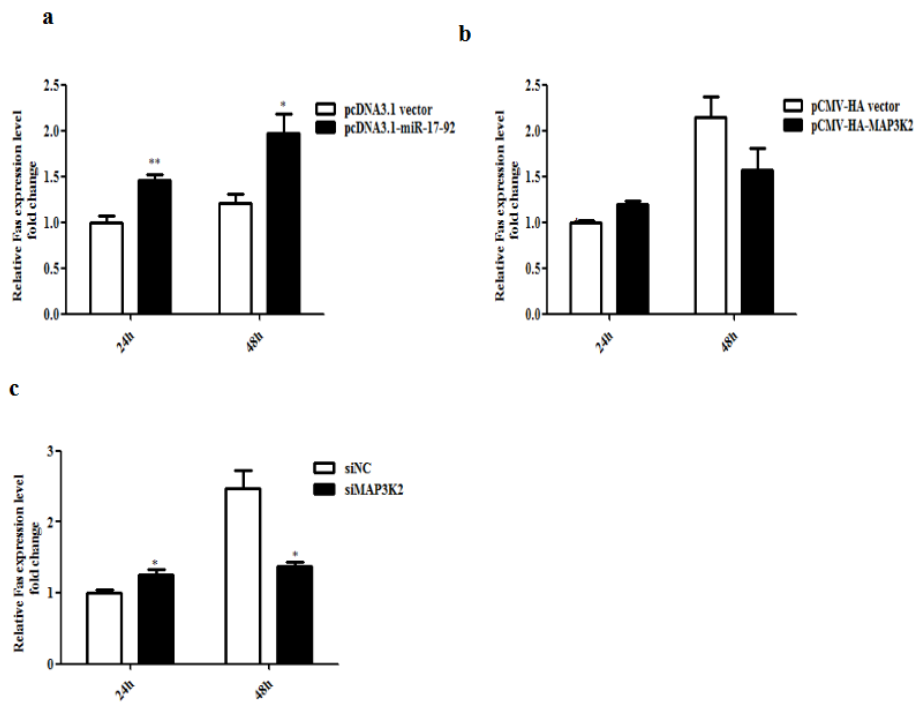

157

158 **Supplemental Figure S5. Effects of the overexpression of the miR-17-92 cluster and**

159 **MAP3K2 and the knockdown of MAP3K2 on FasAS expression in DF1 cells.** DF1 cells (a-c)

160 were transfected with designated plasmids or siRNAs. At 24 and 48 h, respectively, after

161 transfection, total RNA was isolated, and Fas expression was detected using qRT-PCR. Gene

162 expression was normalized to NONO mRNA level. Fold change is relative to either pcDNA3.1

163 vector, pCMV-HA vector or siNC at 24 h after transfection. All data are representative of three

164 independent experiments and shown as the mean  $\pm$  SEM. \*  $p < 0.05$ ; \*\*  $p < 0.01$ ; determined by

165 two-tailed Student's t-test.

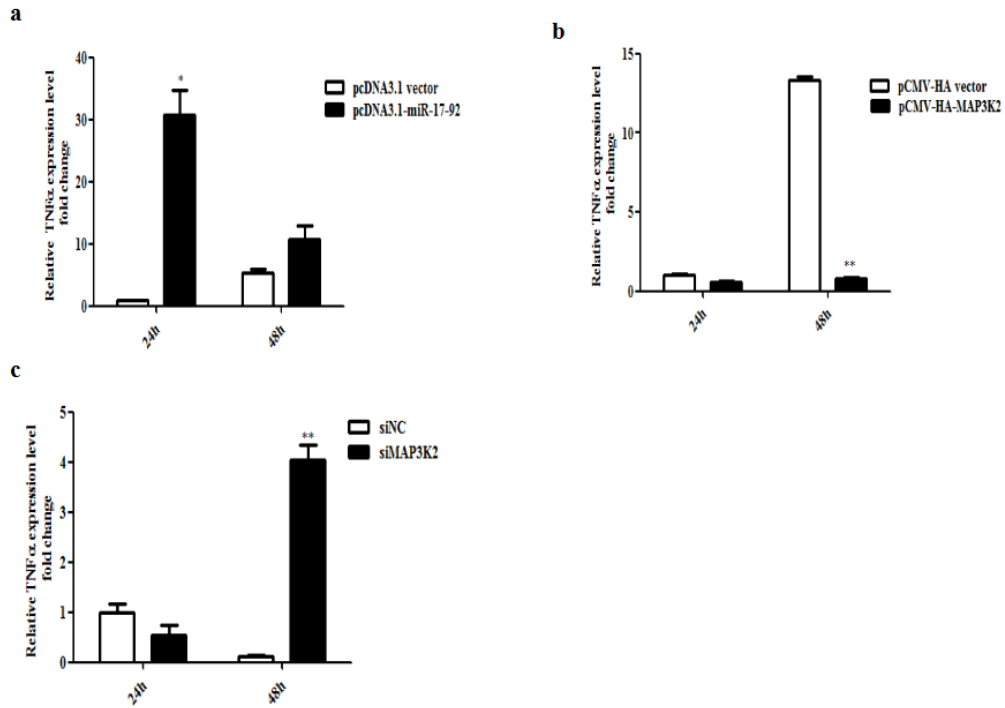

166

167 **Supplemental Figure S6. Effects of overexpression of miR-17-92 cluster and MAP3K2 and**

168 **knockdown of MAP3K2 on TNF $\alpha$  expression in DF1 cells.** DF1 cells (a-c) were transfected

169 with designated plasmids or siRNAs. At 24 and 48 h, respectively, after transfection, total RNAs

170 were isolated, and TNF $\alpha$  expression was detected using qRT-PCR. Gene expression was

171 normalized to NONO mRNA level. Fold change is relative to either pcDNA3.1 vector, pCMV-HA

172 vector or siNC at 24 h after transfection. All data are representative of three independent

173 experiments and shown as the mean  $\pm$  SEM. \*  $p < 0.05$ ; \*\*  $p < 0.01$ ; determined by two-tailed

174 Student's t-test.



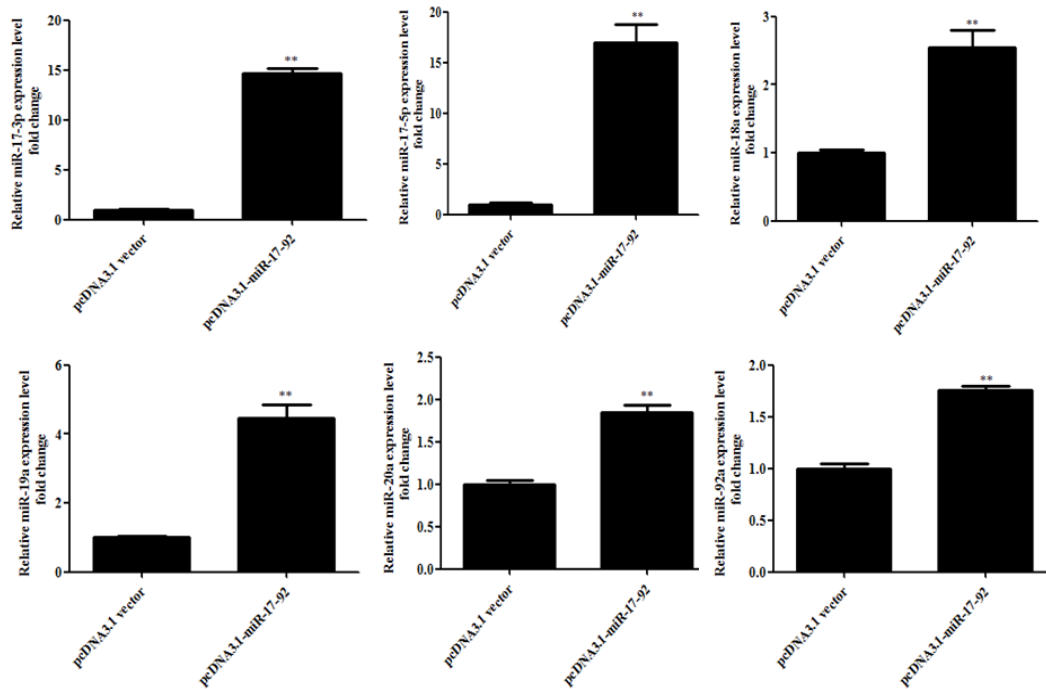

175  
 176  
 177  
 178  
 179  
 180  
 181  
 182  
 183  
 184  
 185  
 186  
 187  
 188  
 189  
 190  
 191  
 192  
 193  
 194  
 195  
 196  
 197  
 198

**Supplementary Figure S7. The relative expression of individual members of miR-17-92 cluster in DF1 cells transfected with pcDNA3.1-miR-17-92.** DF1 cells were transfected with either pcDNA3.1-miR-17-92 or pcDNA3.1 vector. At 24 h after transfection, total RNA was isolated; the relative miRNA expression was analysed using stem-loop qRT-PCR. Fold change is relative to [pcDNA3.1\\_pCMV-HA](#) vector after normalization to U6 snRNA. All data are representative of three independent experiments and shown as the mean  $\pm$  SEM. \*\*  $p < 0.01$ ; determined by two-tailed Student's t-test.

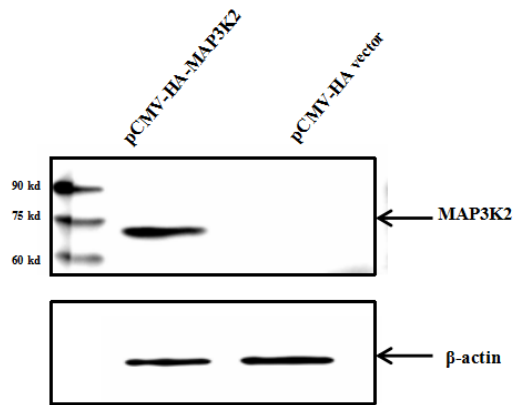

199  
200  
201  
202  
203  
204  
205  
206  
207  
208  
209  
210  
211  
212  
213  
214  
215  
216  
217  
218  
219  
220  
221  
222  
223  
224  
225  
226  
227  
228  
229  
230  
231

**Supplementary Figure S8. Identification of MAP3K2 expression vector (pCMV-HA-MAP3K2) using western blotting.** DF1 cells were transfected with either pCMV-HA-MAP3K2 or pCMV-HA vector. At 48 h post-transfection, the cells were harvested, and MAP3K2 protein was detected by western blotting using an anti-HA tag antibody (top panel).  $\beta$ -actin was used a loading control (bottom panel).

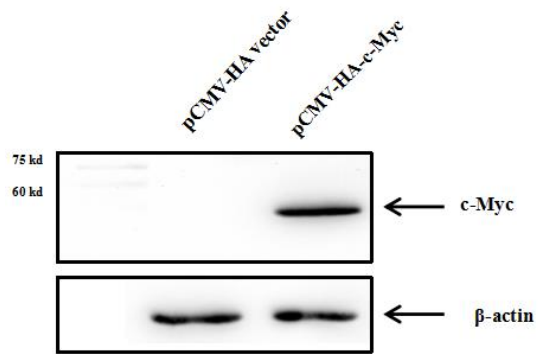

232

233

234 **Supplementary Figure S9. Identification of c-Myc expression vector (pCMV-HA-c-Myc)**

235 **using western blotting.** DF1 cells were transfected with either pCMV-HA-c-Myc or pCMV-HA

236 vector. At 48 h post-transfection, the cells were harvested, and c-Myc protein was detected by

237 western blotting using an anti-HA tag antibody (top panel).  $\beta$ -actin was used as a loading control

238 (bottom panel).

239

240
